# Supplementary material for: Diagnosis of Plant Viruses Using NGS to Support Virus Management and Tomato Breeding
Source: Preprints.org preprint supplement (doi:10.20944/preprints202404.1813.v1), 2024-04-28
Supplement: Supplementary file 1 [file supplementary]

## Sheet: Table S1
Table S1. Details of the 52 complete genomes of ToMV isolates used in this study.
Isolate	Country	Accession No.	Host	Collection year
SRVP22_05	Russia	OQ722333	Treated wastewater	2022
OM	Japan	X02144	Tomato	1984
K2	Russia	Z92909	Tobacco	1997
K1	Russia	AJ243571	Tobacco	1999
ToMV-KMT	Japan	LC650928	Tomato	2012
L11A-Fukushima	Japan	AB083196	Tomato	2002
L11Y	Japan	AB355139	Tobacco	2007
N5	China	GQ280794	Tomato	2005
XJT-1	China	FN985165	Tomato	2010
AH4	Egypt	KU321698	Tomato	2015
FERA_160205	United kingdom	KY810788	Tomato	2016
Neimenggu	China	KY949480	Tomato	2016
LC	China	KY949481	Tomato	2016
SX	China	KY967219	Tomato	2016
SGHG	China	KY967220	Tomato	2016
SGZZ	China	KY967221	Tomato	2016
Tai'an	China	KY967222	Tomato	2016
ZB	China	KY967223	Tomato	2016
JN	China	KY967224	Tomato	2016
LY	China	KY967225	Tomato	2016
HY	China	KY967226	Tomato	2016
YT	China	KY967227	Tomato	2016
HHHT	China	KY967228	Tomato	2016
HHHT4	China	MF002479	Tomato	2016
HHHT3	China	MF002480	Tomato	2016
HHHT2	China	MF002481	Tomato	2016
SX1	China	MF002483	Tomato	2016
GS100	China	MF002484	Tomato	2016
GS1	China	MF002485	Tomato	2016
SX2	China	MF002486	Tomato	2016
Tai'an1	China	MF002487	Tomato	2016
Tai'an2	China	MF002488	Tomato	2016
LC1	China	MF002489	Tomato	2016
JX	China	MF002490	Tomato	2016
XT	China	MF002491	Tomato	2016
WW17-I-f16-18-Nocc-pos2	Slovenia	MN267904	Nicotiana occidentalis	2019
DTT	Vietnam	MW012409	Tomato	2017
NGSTPS18/DSMZ PV-0135	Germany	MW848529	Tomato	2018
Tianjin	China	MW042871	Tomato	2020
NVWA36783860	China	OL652662	Tomato	2020
IFA9	Italy	ON156781	Tomato	1974
Camellia	China	AJ417701	Camellia	2001
ToMV1-2	Germany	DQ873692	Tomato	2006
K	Republic of China	AF155507	Tomato	1999
Penghu	Taiwan	KJ207374	Solanum muricatum	2011
99-1	USA	KR537870	Jasminum multiflorum	1999
SL-1	Slovakia	KY912162	Tomato	2017
Mutoko	Zimbabwe	KX711903	Tomato	2015
ToMV-Ug	Uganda	MG456601	Tomato	2010
Queensland	Australia	NC_002692	Tomato	2000
GW1	South Korea	MH507165	Tomato	2016
GW2	South Korea	MH507166	Tomato	2016
