# Supplementary material for: Diagnosis of Plant Viruses Using NGS to Support Virus Management and Tomato Breeding
Source: Preprints.org preprint supplement (doi:10.20944/preprints202404.1813.v1), 2024-04-28

**Sample JCM07-5**

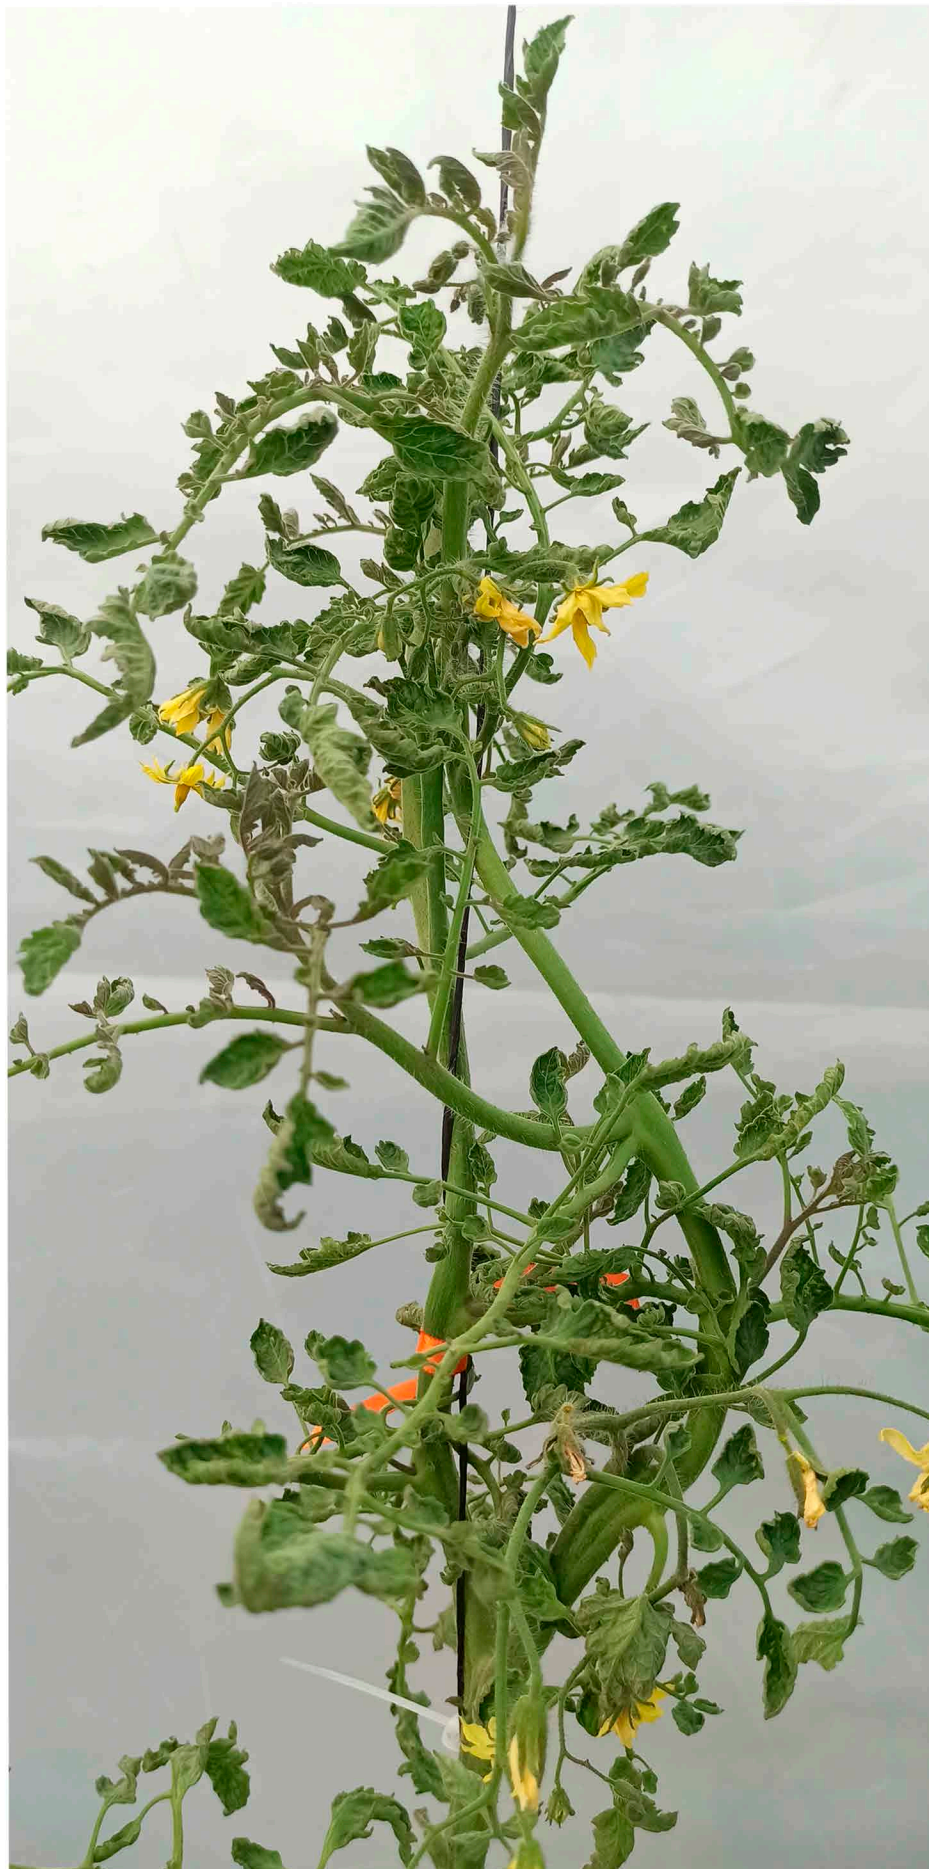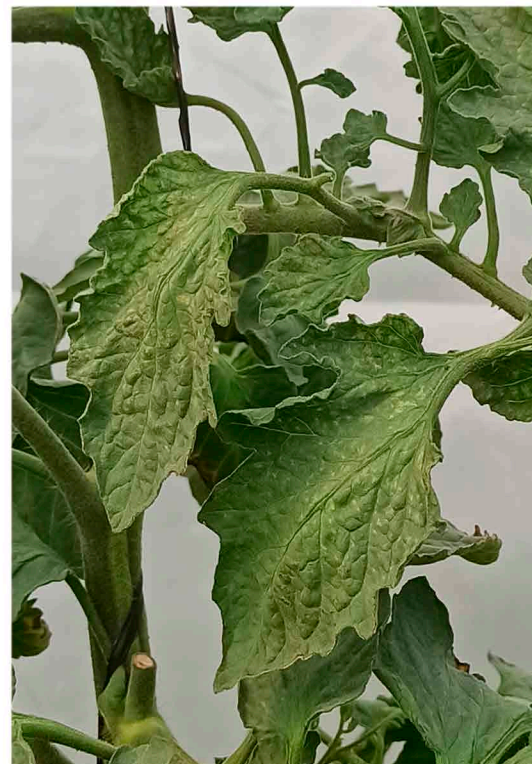

**PHYVV + ToMV**

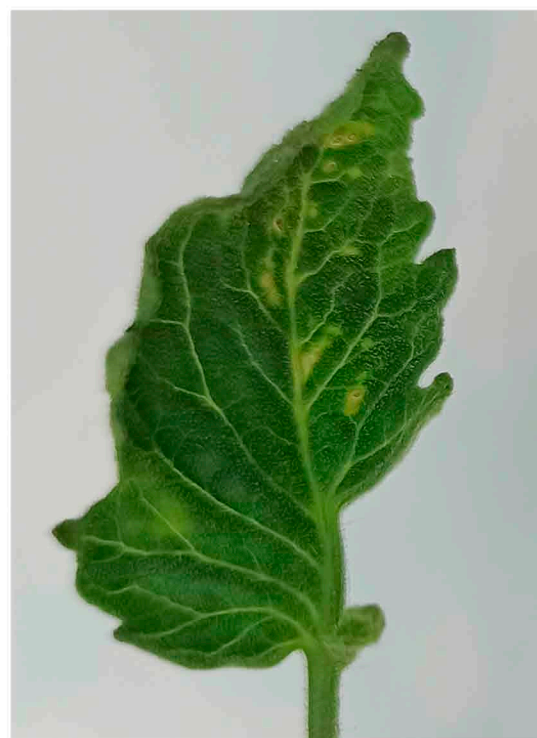



**Sample JCM08-2**

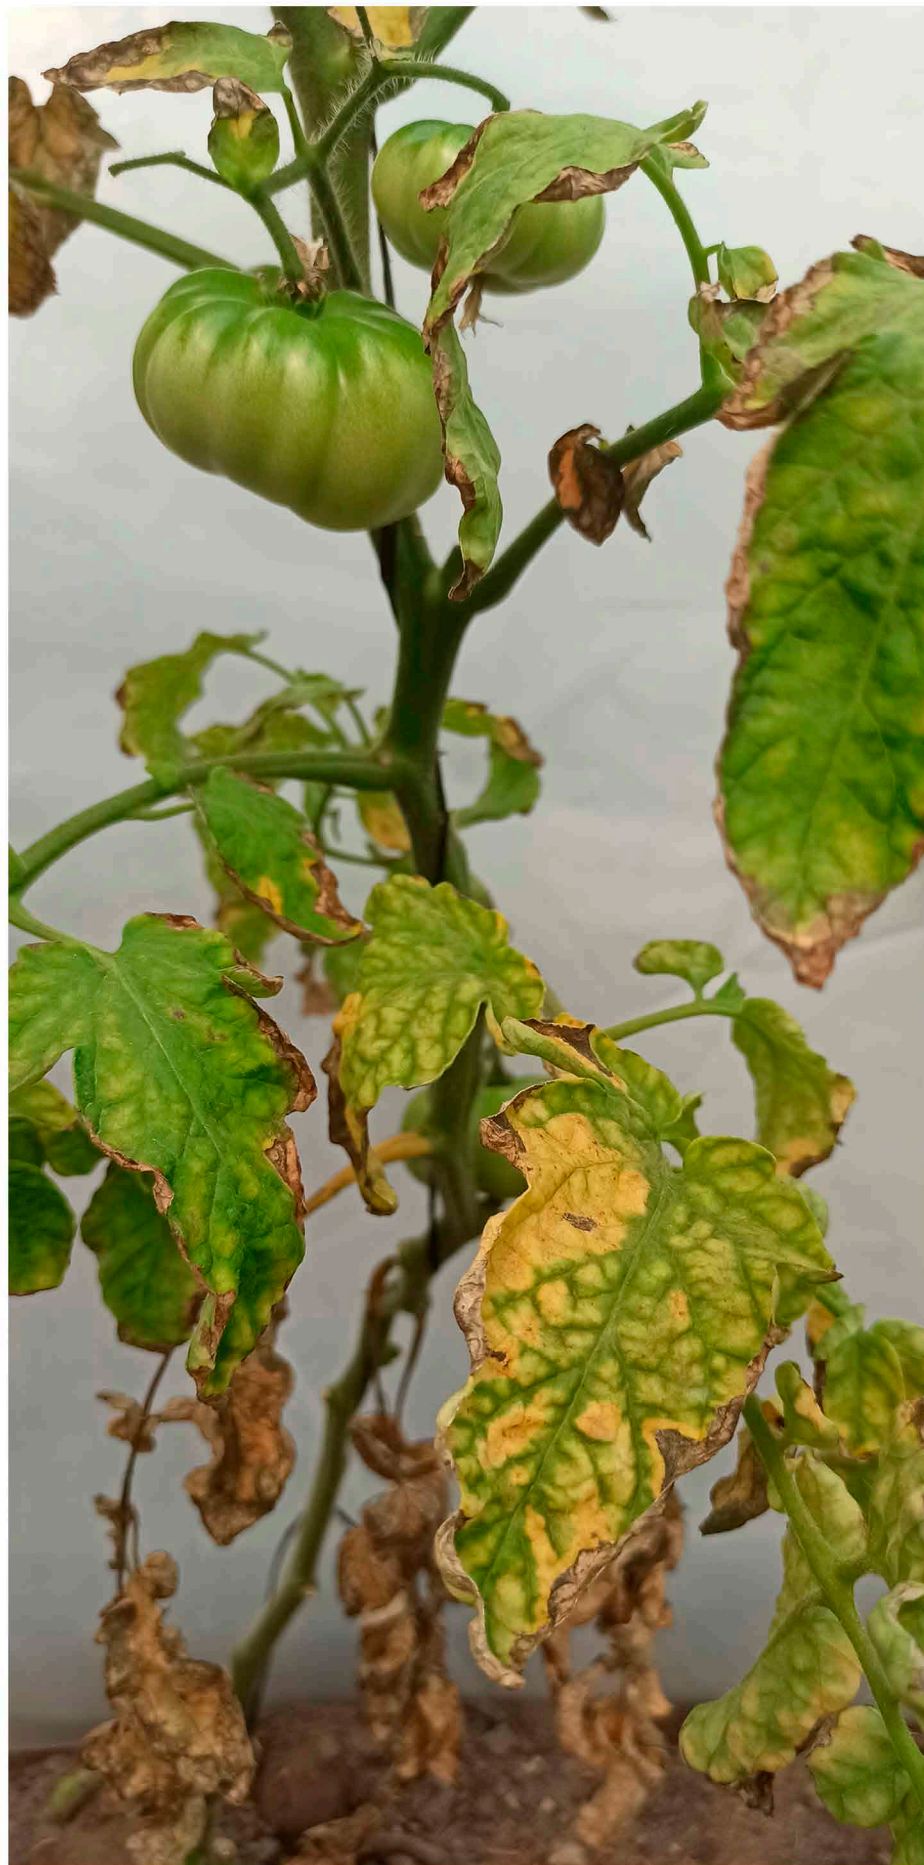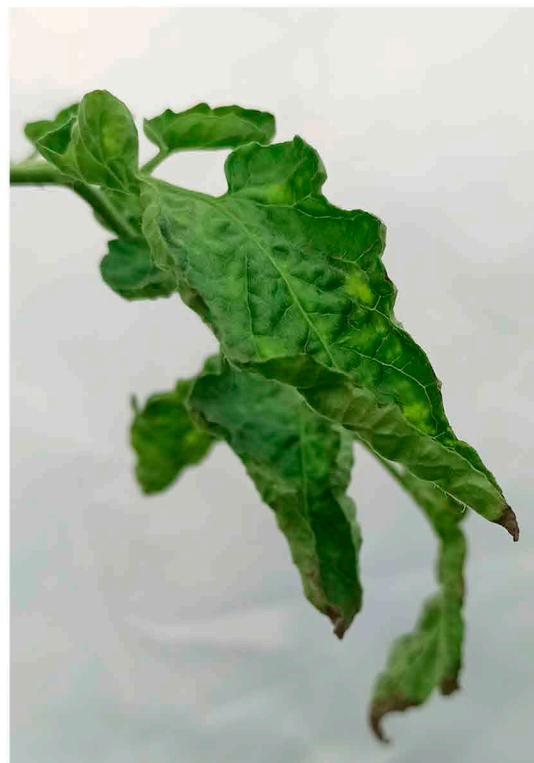

**ToGMoV + ToMV**

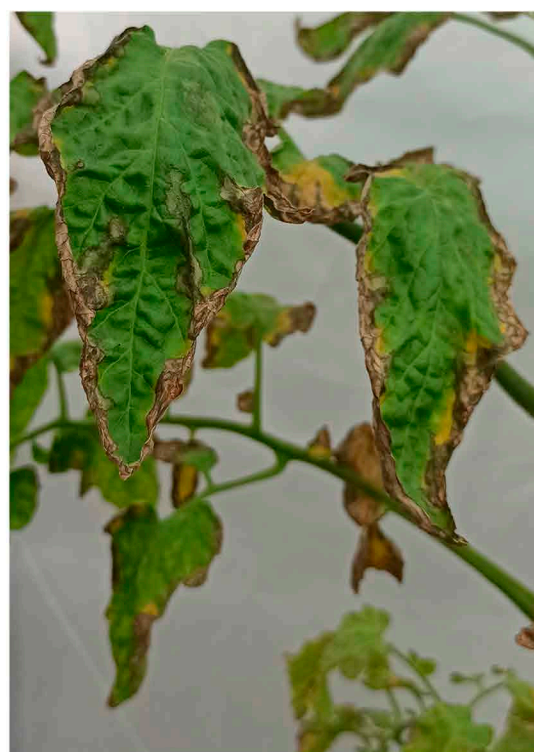



**Sample JCM08-3**

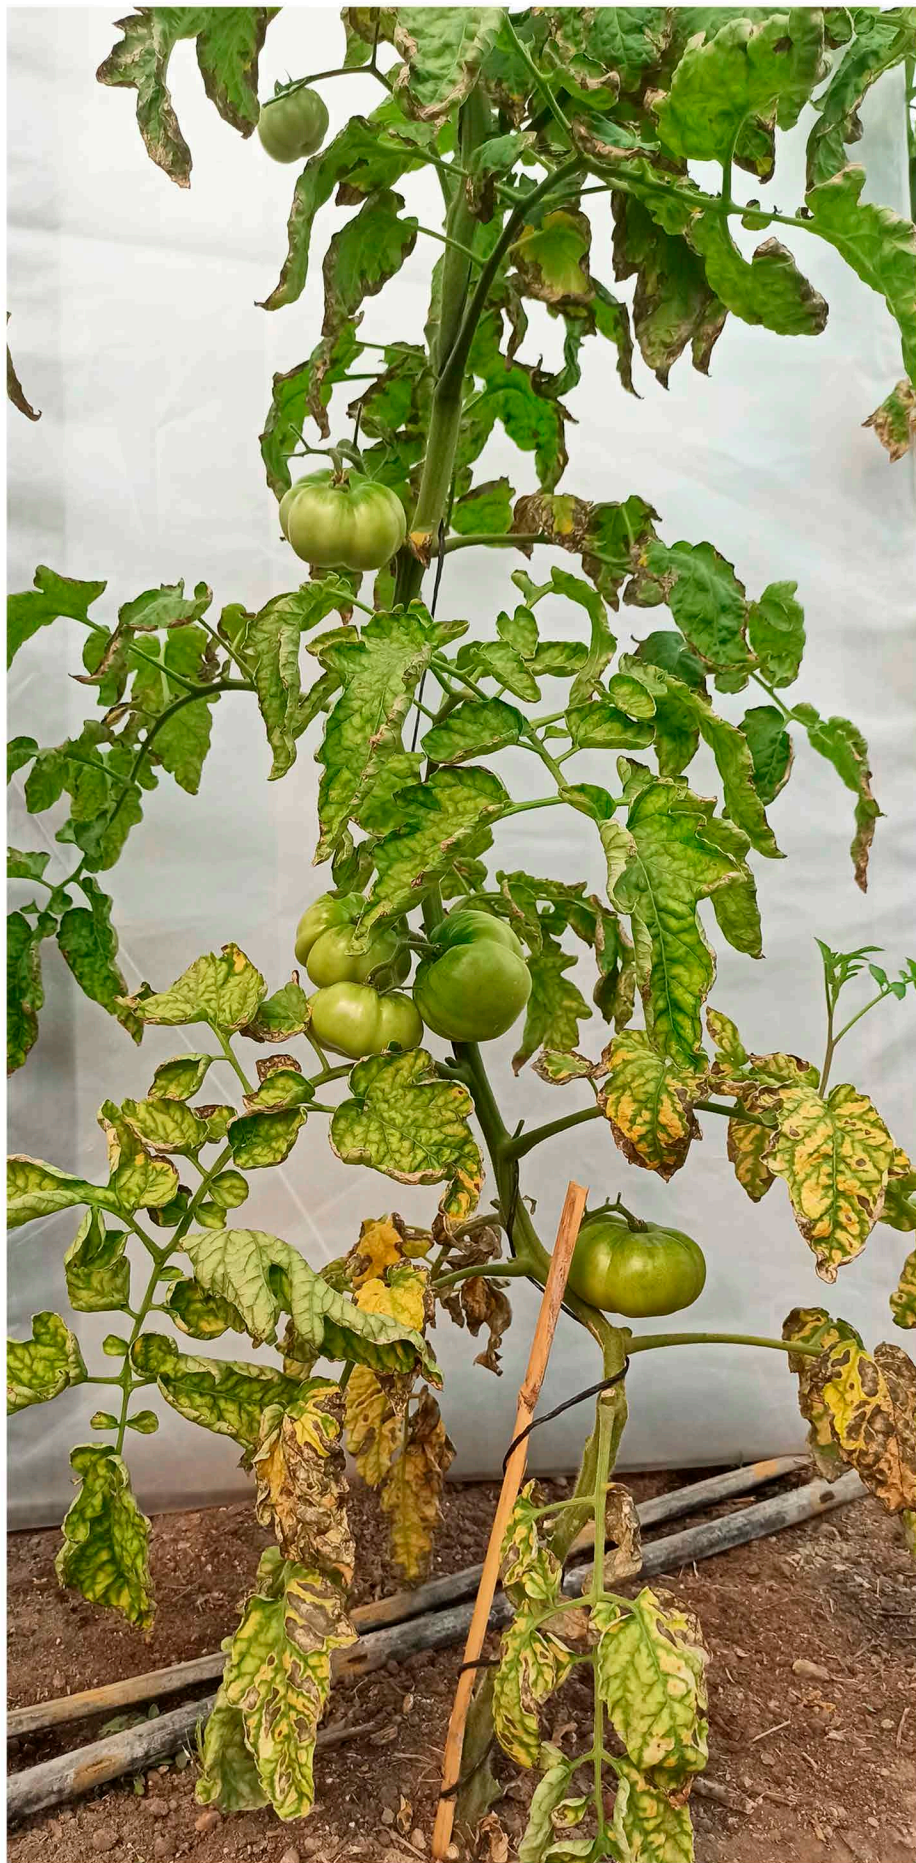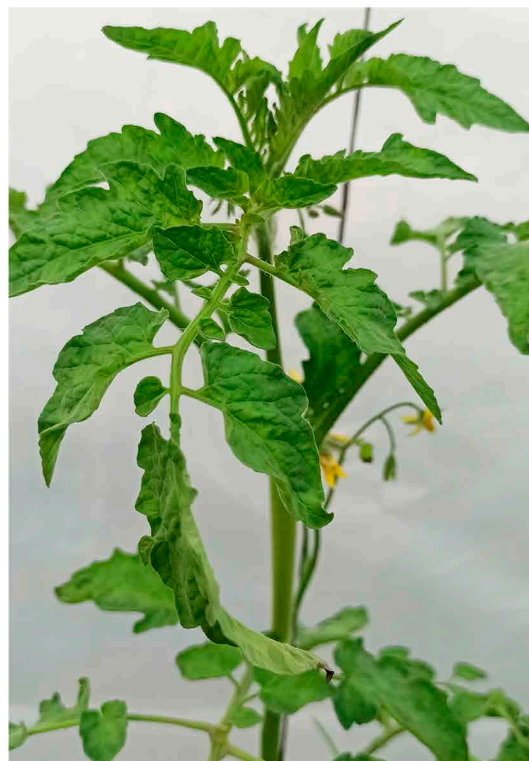

**ToGMoV + ToMV**

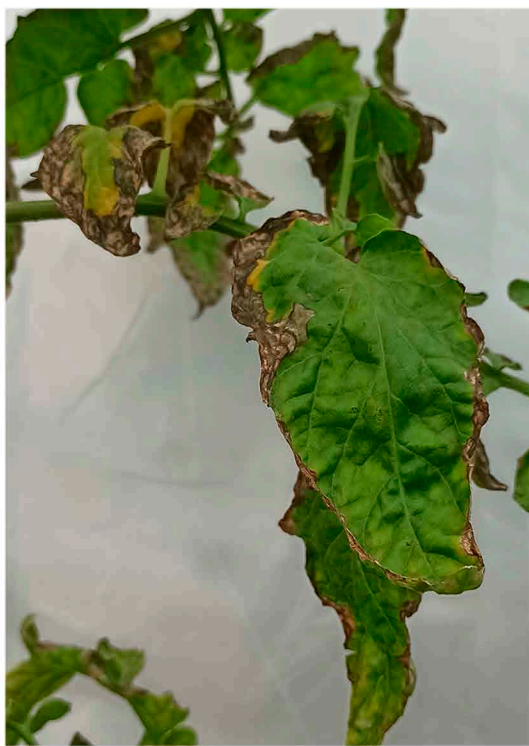



**Sample JCM07-1**

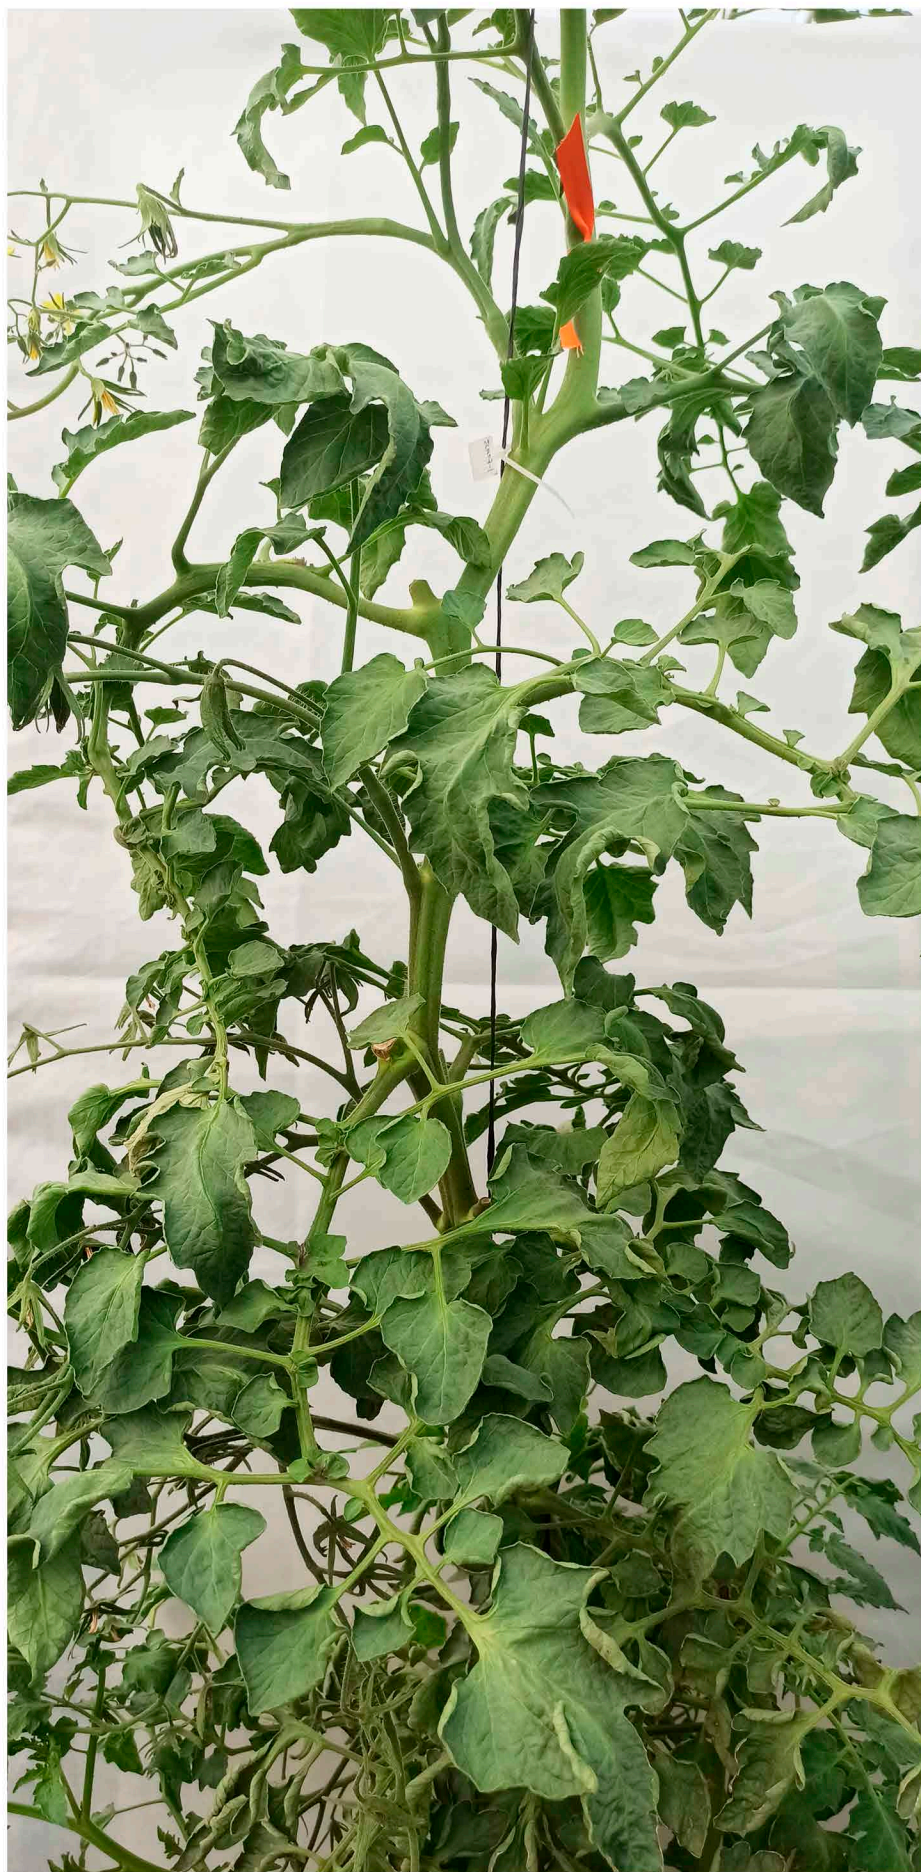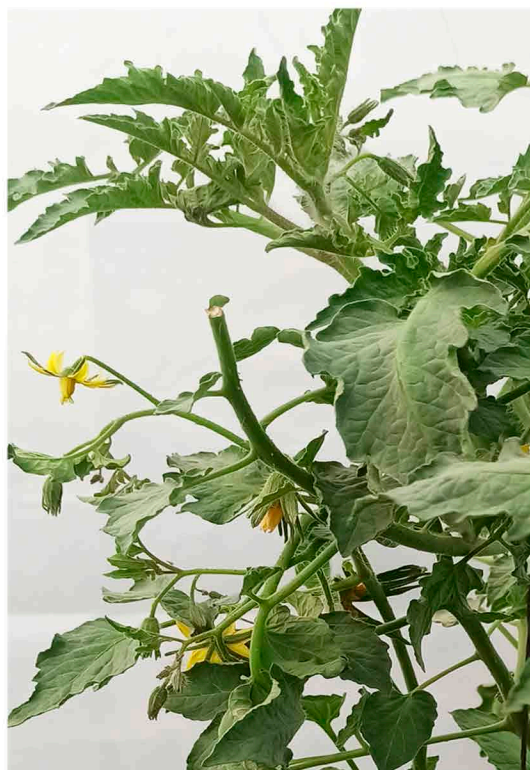

**ToMV**

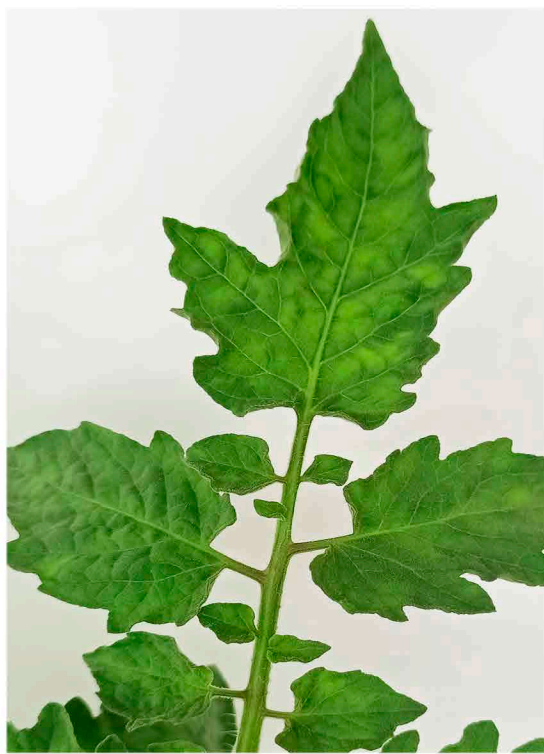



**Sample JCM07-11**

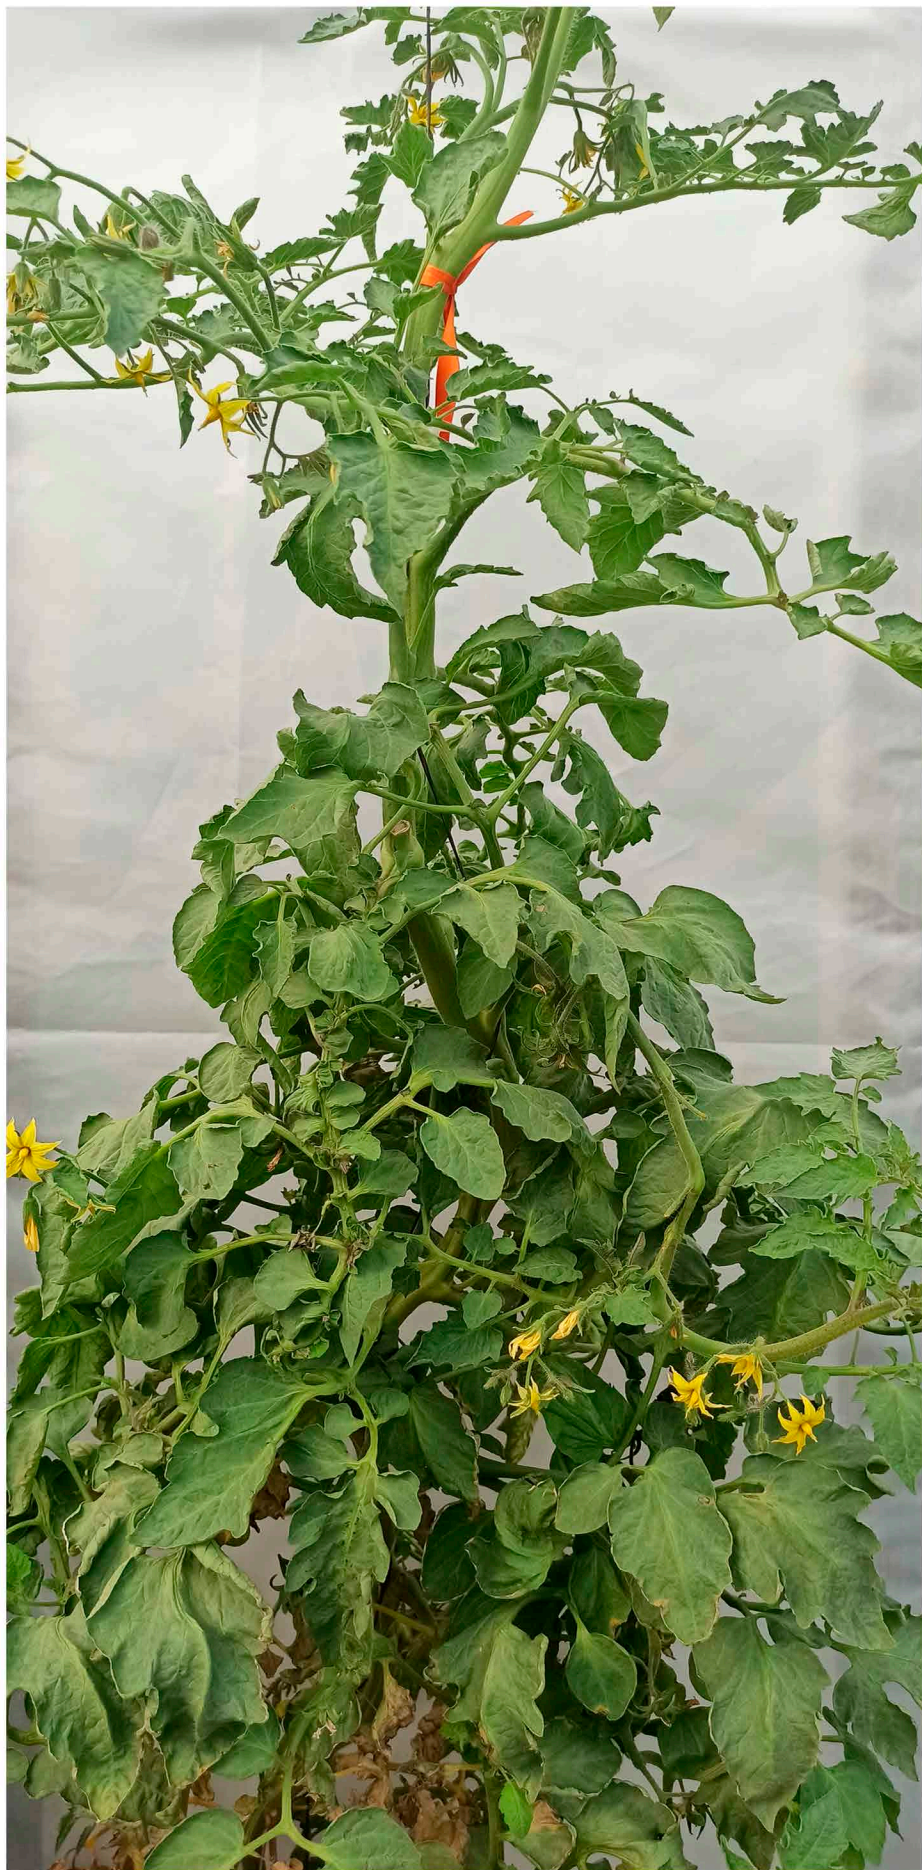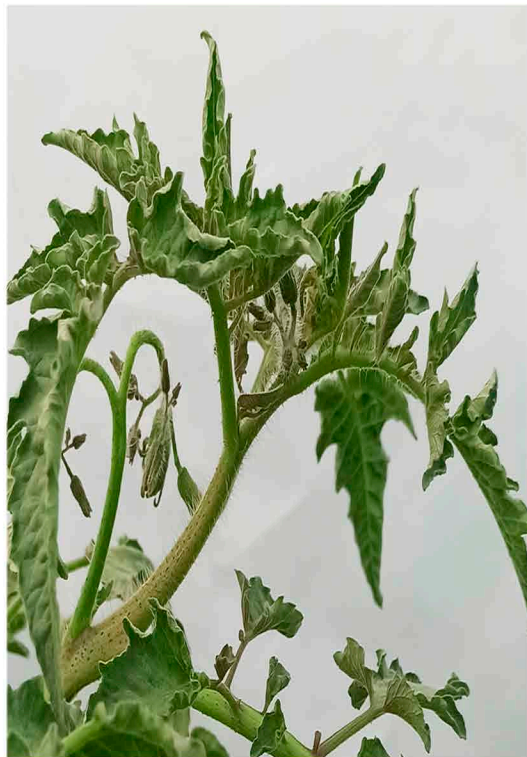

**ToMV**

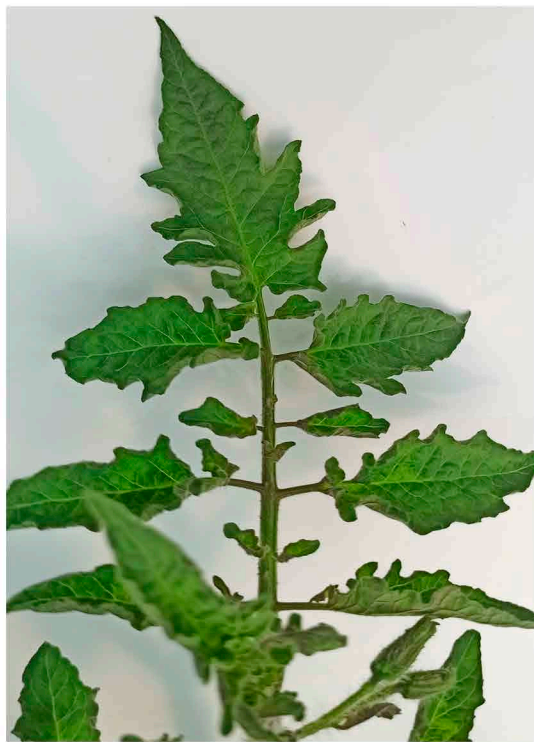

Supplement: Supplementary file 4 [file supplementary]
